# Supplementary material
Source: Springer Nature journal article supplement (https://www.springermedizin.de/resource/supplementary/12902_2013_197_MOESM5_ESM.pdf/9515736)

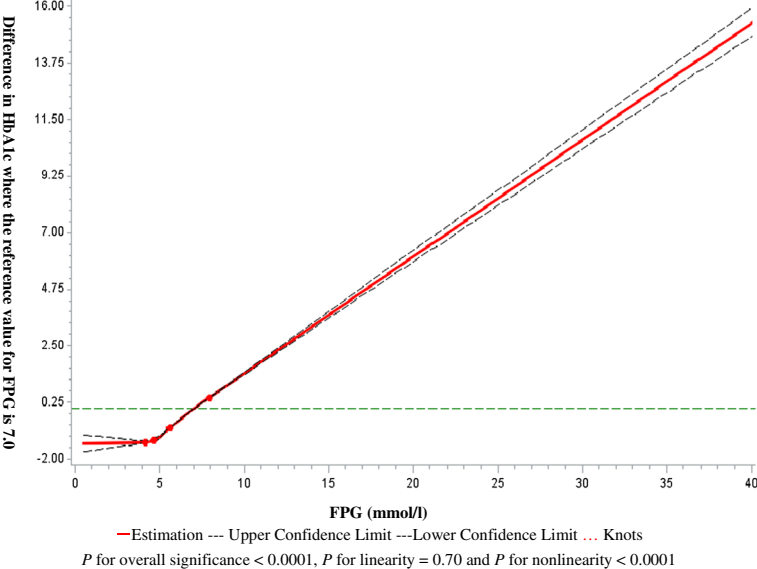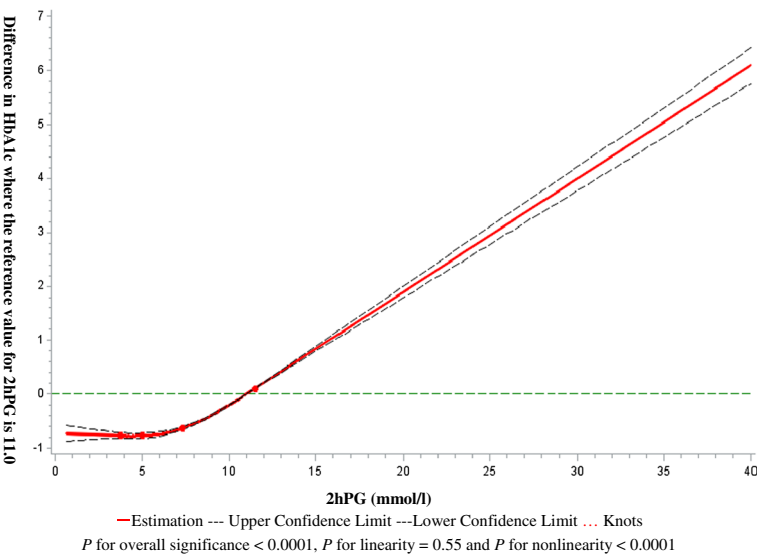

Supplement: MOESM5 [file 9515736]
